# Supplementary material for: Radiation Increases Functional KCa3.1 Expression and Invasiveness in Glioblastoma
Source: MDPI journal article supplement (doi:10.3390/cancers11030279), 2019-02-26
Supplement: s1 [file s1]

# Supplementary Materials: Radiation Increases Functional KCa3.1 Expression and Invasiveness in Glioblastoma

Giuseppina D'Alessandro, Lucia Monaco, Luigi Catacuzzeno, Fabrizio Antonangeli, Antonio Santoro, Vincenzo Esposito, Fabio Franciolini, Heike Wulff and Cristina Limatola

## Supplementary Method

### MTT Assay

Twenty-four hours after irradiation, GL-15 cells ( $10^4$ /well) were seeded in 96 well-plate and assayed for their viability after further 48 hours. After this time, MTT salt (500  $\mu\text{g/mL}$ ) was added into each well for 1.5 h. DMSO was then added to stop the reaction and the formazan produced was measured at 570 nm. Viability of cells was expressed relative to absorbance.

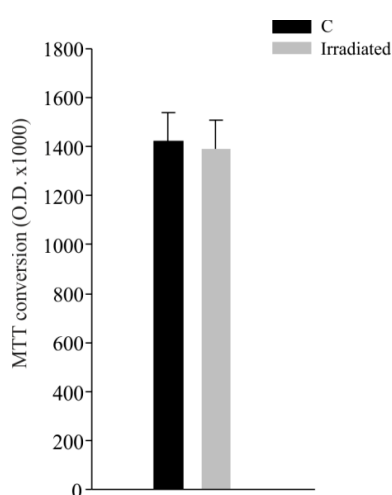

**Figure S1.** MTT assay on irradiated GL-15 cells. Cell viability did not show significantly difference between GL-15 control (C) and GL-15 Irradiated 72 h after irradiation protocol;  $n = 3$  (six replicate each) by Student *t*-test.

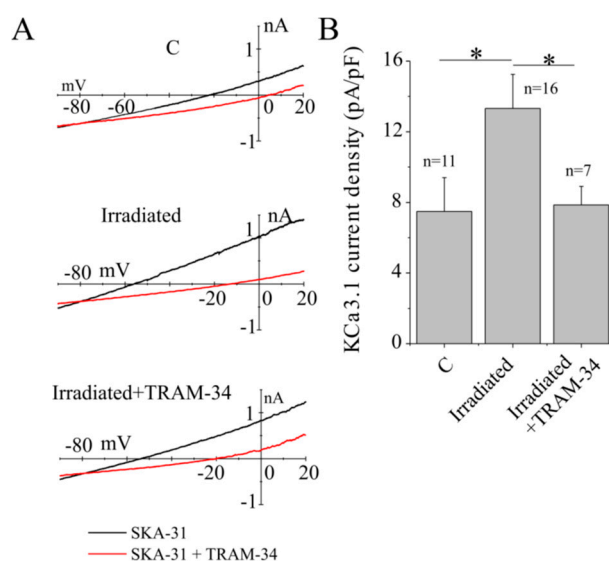

**Figure S2.** KCa3.1 current in irradiated GL-15 cells. (A) Current voltage relationships obtained by applying voltage ramps from  $-90$  to  $+20$  mV, from a holding potential of  $-60$  mV, to GL15 cells

cultured at the indicated three different conditions: control (C), Irradiated and Irradiated+TRAM-34 for 48h. Black traces are in presence of external SKA-31 (3  $\mu$ M), while red traces are in presence of external SKA-31 (3  $\mu$ M) + TRAM-34 (3  $\mu$ M). Irradiated +TRAM-34 cells were recorded after a minimum time of 30 min washing in the external recording solution, in order to allow reversion of the inhibitory effect of TRAM-34. External recording solution (in mM): NaCl 140, KCl 5, CaCl<sub>2</sub> 2, MgCl<sub>2</sub> 2, MOPS 5, glucose 10, pH 7.4 with NaOH. Internal recording solution: KCl 155, EGTA-K 1, MgCl<sub>2</sub> 1, MOPS 5, pH 7.2 with KOH. CaCl<sub>2</sub> was added to the internal solution to obtain a free Ca<sup>2+</sup> concentration of 1  $\mu$ M. (B) Mean KCa<sub>3.1</sub> current densities (current to electrical capacitance ratio) assessed at 0 mV as the TRAM-34 sensitive current. Data were obtaining using two different KCa<sub>3.1</sub> channel activators (NS309 10  $\mu$ M, *n* = 7, 13, and 6 for C, Irradiated, and Irradiated+TRAM-34 cells; SKA-31 3  $\mu$ M, *n* = 4, 3, and 1 for the C, Irradiated, and Irradiated+TRAM-34 cells) were pooled together. \* *p* < 0.05 by One-Way ANOVA.

TCGA - Glioblastoma

Kaplan-Meier plot

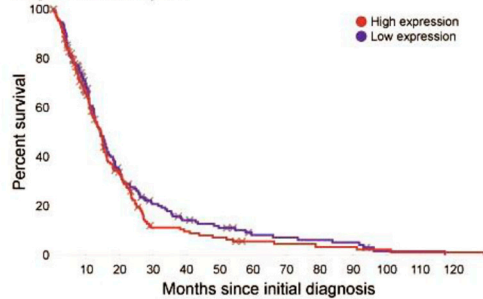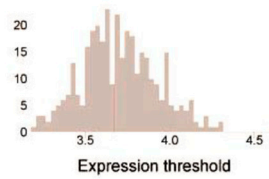

Visualization

Samples: 348 / 454  
Censored: 50 / 348  
Gene: IL4

Platforms

Affy Human Exon 1.0 ST

Preset thresholds

25% Median 75%

Statistics

P-value (logrank test): 0.283

Export

Table SVG

TCGA - Glioblastoma

Kaplan-Meier plot

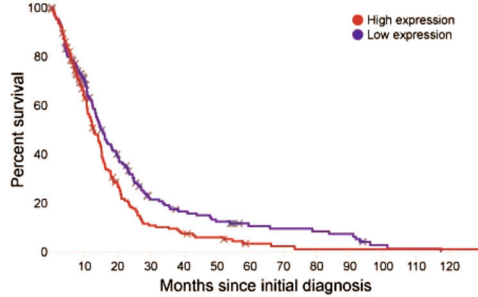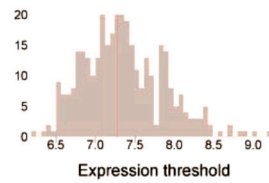

Visualization

Samples: 348 / 454  
Censored: 50 / 348  
Gene: IL4R

Platforms

Affy Human Exon 1.0 ST

Preset thresholds

25% Median 75%

Statistics

P-value (logrank test): 0.0100

Export

Table SVG

TCGA - Glioblastoma

Kaplan-Meier plot

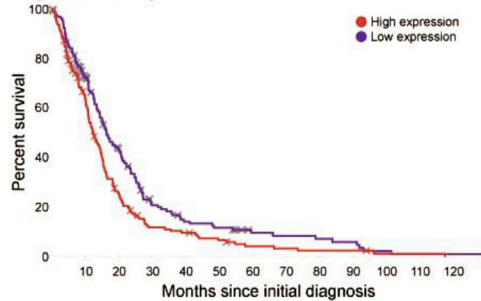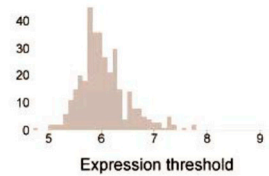

Visualization

Samples: 348 / 454  
Censored: 50 / 348  
Gene: KCNN4

Platforms

Affy Human Exon 1.0 ST

Preset thresholds

25% Median 75%

Statistics

P-value (logrank test): 0.00313

Export

Table SVG

TCGA - Glioblastoma

Kaplan-Meier plot

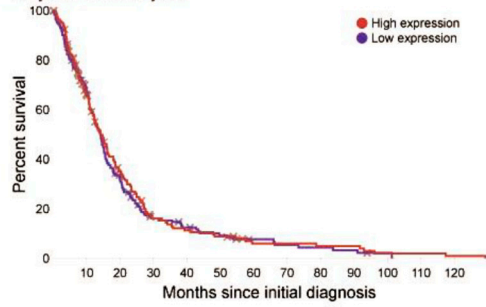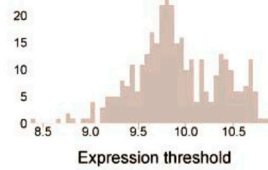

**Visualization**  
 Samples: 348 / 454  
 Censored: 50 / 348  
 Gene: ATF2

**Platforms**  
 Affy Human Exon 1.0 ST

**Preset thresholds**  
 25%  Median  75%

**Statistics**  
 P-value (logrank test): 0.604

**Export**

TCGA - Glioblastoma

Kaplan-Meier plot

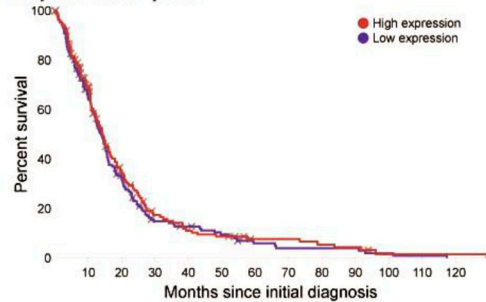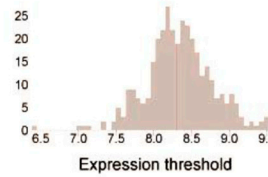

**Visualization**  
 Samples: 348 / 454  
 Censored: 50 / 348  
 Gene: REST

**Platforms**  
 Affy Human Exon 1.0 ST

**Preset thresholds**  
 25%  Median  75%

**Statistics**  
 P-value (logrank test): 0.478

**Export**

TCGA - Glioblastoma

Kaplan-Meier plot

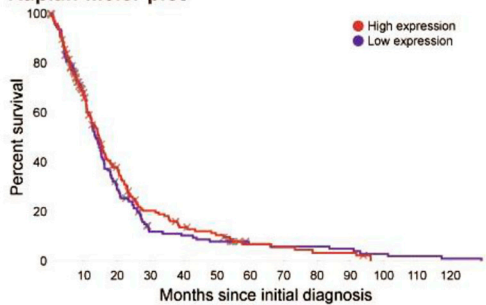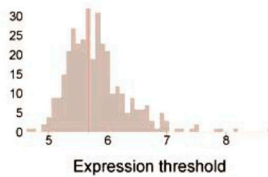

**Visualization**  
 Samples: 348 / 454  
 Censored: 50 / 348  
 Gene: EGR3

**Platforms**  
 Affy Human Exon 1.0 ST

**Preset thresholds**  
 25%  Median  75%

**Statistics**  
 P-value (logrank test): 0.574

**Export**

**Figure S3.** Survival Analysis based on gene expression. Survival analysis based on expression of the indicated genes. Analysis was performed using the Affymetrix Human Exon 1.0 ST platform (TCGA GBM dataset, project Betasasis).

**Table S1.** The effects of radiation (IRR) and radiation + TRAM-34 (IRR+TRAM-34) treatment on gene expression in each cell population. Values are shown as mRNA fold increase over respective not irradiated cells of indicated genes. Each primary cell culture was tested twice.

| Gene   | GBM18 |      | GBM19 |      | GBM45 |     | GBM18      |            | GBM19      |            | GBM45      |            |
|--------|-------|------|-------|------|-------|-----|------------|------------|------------|------------|------------|------------|
|        | IRR   | IRR  | IRR   | IRR  | IRR   | IRR | IRR + TRAM | IRR + TRAM | IRR + TRAM | IRR + TRAM | IRR + TRAM | IRR + TRAM |
| AP1    | 1.1   | 1.1  | 1.3   | 1.2  | 1.8   | 1.8 | 0.9        | 0.9        | 2.2        | 2.2        | 1.1        | 1.1        |
| ATF2   | 1.3   | 1.4  | 1.8   | 1.9  | 1.9   | 2.0 | 0.5        | 0.5        | 1.8        | 1.7        | 0.7        | 0.7        |
| EGR3   | 12.7  | 12.3 | 6.6   | 6.6  | 4.4   | 4.4 | 6.8        | 6.5        | 2.6        | 2.6        | 2.3        | 2.2        |
| REST   | 0.9   | 1.0  | 0.9   | 0.9  | 1.5   | 1.5 | 0.6        | 0.6        | 1.3        | 1.3        | 0.8        | 0.8        |
| CXCL12 | 7.2   | 7.0  | 3.5   | 3.7  | 2.2   | 2.4 | 2.7        | 3.0        | 3.0        | 3.1        | 3.3        | 3.3        |
| CXCR4  | 4.4   | 4.4  | 3.5   | 3.5  | 2.3   | 2.4 | 1.6        | 1.6        | 3.3        | 3.3        | 0.8        | 0.8        |
| MMP2   | 6.9   | 6.7  | 4.6   | 4.6  | 1.3   | 1.2 | 3.6        | 3.5        | 8.5        | 8.0        | 1.0        | 1.1        |
| MMP9   | 17.6  | 18.0 | 3.2   | 3.3  | 3.0   | 3.0 | 3.9        | 3.9        | 0.5        | 0.6        | 0.5        | 0.5        |
| KCNN4  | 20.1  | 21.0 | 10.9  | 10.4 | 5.8   | 6.0 | 7.5        | 7.5        | 0.5        | 0.5        | 2.6        | 2.8        |

**Table S2.** GBM patient's information.

| <b>Name.</b> | <b>Age (Years)</b> | <b>Sex</b> | <b>Grade (WHO)</b> | <b>Relapse (Y/N)</b> |
|--------------|--------------------|------------|--------------------|----------------------|
| GBM18        | 73                 | Male       | IV                 | N                    |
| GBM19        | 79                 | Male       | IV                 | N                    |
| GBM45        | 62                 | Female     | IV                 | N                    |
| GBM137       | 72                 | Male       | IV                 | N                    |

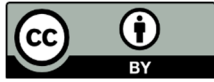

© 2019 by the authors. Licensee MDPI, Basel, Switzerland. This article is an open access article distributed under the terms and conditions of the Creative Commons Attribution (CC BY) license (<http://creativecommons.org/licenses/by/4.0/>).
